# Supplementary material for: Phagocyte Chemoattraction Is Induced through the Mcp-1–Ccr2 Axis during Efferocytosis
Source: Cells. 2021 Nov 10;10(11):3115. doi: 10.3390/cells10113115 (PMC8620886; doi:10.3390/cells10113115)
Supplement: Supplementary file 1 [file cells-10-03115-s001.zip › cells-1434864-revised-Supplemenatry table.xlsx]

## Sheet: Overexpression
Index	Probe Set ID	Description	Gene Symbol	Accession_ID	UniGene ID	#3/#1 intensity	1 signal value	3 signal value	Entrez Gene	Chromosomal Location	Alignments	Ensembl	SwissProt	RefSeq Protein ID	EC	RefSeq Transcript ID	MGI Name	Gene Ontology Biological Process	Gene Ontology Cellular Component	Gene Ontology Molecular Function	Pathway	Annotation Transcript Cluster	Transcript ID(Array Design)	Target Description	Representative Public ID
32482	1448182_a_at	CD24a antigen	Cd24a	NM_009846	Mm.6417	17.7408	2.26069	40.1064	12484	chr10 B2|10 26.0 cM	chr10:43298930-43304073 (+) // 95.36 // q11.21 /// chr14:120043180-120048861 (+) // 89.95 //	ENSMUSG00000047139	P24807 /// Q3THW4 /// Q61692 /// Q8CEU3	NP_033976		NM_009846	88323	0001666 // response to hypoxia // inferred from sequence or structural similarity /// 0001775 // cell activation // inferred from sequence or structural similarity /// 0001934 // positive regulation of protein phosphorylation // inferred from sequence or structural similarity /// 0001959 // regulation of cytokine-mediated signaling pathway // inferred from mutant phenotype /// 0002237 // response…	0005624 // membrane fraction // inferred from direct assay /// 0005886 // plasma membrane // inferred from direct assay /// 0005886 // plasma membrane // inferred from electronic annotation /// 0009897 // external side of plasma membrane // inferred from direct assay /// 0009897 // external side of plasma membrane // not recorded /// 0009897 // external side of plasma membrane // inferred from el…	0019901 // protein kinase binding // inferred from sequence or structural similarity /// 0030246 // carbohydrate binding // inferred from direct assay /// 0030296 // protein tyrosine kinase activator activity // inferred from sequence or structural similarity /// 0043499 // eukaryotic cell surface binding // inferred from direct assay		BC075622(11),M58661(10),NM_009846(11)	Mm.6417.1	gb:NM_009846.1 /DB_XREF=gi:6753341 /GEN=Cd24a /FEA=FLmRNA /CNT=468 /TID=Mm.6417.1 /TIER=FL+Stack /STK=140 /UG=Mm.6417 /LL=12484 /DEF=Mus musculus CD24a antigen (Cd24a), mRNA. /PROD=CD24a antigen /FL=gb:NM_009846.1 gb:M58661.1	NM_009846
34279	1449984_at	chemokine (C-X-C motif) ligand 2	Cxcl2	NM_009140	Mm.4979	9.57271	4.59714	44.0071	20310	chr5 E1|5 51.0 cM	chr5:91332924-91334964 (+) // 95.75 // q14.3	ENSMUSG00000058427	P10889 /// Q3U1J5 /// Q3U1L9 /// Q3UCP1	NP_033166		NM_009140	---	0006935 // chemotaxis // inferred from electronic annotation /// 0006954 // inflammatory response // inferred from electronic annotation /// 0006955 // immune response // inferred from electronic annotation /// 0030593 // neutrophil chemotaxis // not recorded /// 0030593 // neutrophil chemotaxis // inferred from electronic annotation /// 0030595 // leukocyte chemotaxis // not recorded /// 0030595…	0005576 // extracellular region // inferred from electronic annotation /// 0005615 // extracellular space // inferred from direct assay /// 0005615 // extracellular space // inferred from electronic annotation	0005125 // cytokine activity // inferred from electronic annotation /// 0008009 // chemokine activity // inferred from electronic annotation		ENSMUST00000075433(10),NM_009140(10)	Mm.4979.1	gb:NM_009140.1 /DB_XREF=gi:6677884 /GEN=Scyb2 /FEA=FLmRNA /CNT=4 /TID=Mm.4979.1 /TIER=FL /STK=3 /UG=Mm.4979 /LL=20310 /DEF=Mus musculus small inducible cytokine subfamily, member 2 (Scyb2), mRNA. /PROD=small inducible cytokine subfamily, member 2 /FL=gb:NM_009140.1	NM_009140
7441	1423135_at	thymus cell antigen 1, theta	Thy1	NM_009382	Mm.3951	7.94212	2.49311	19.8006	21838	chr9 A5.1|9 26.0 cM	chr9:43853761-43856662 (+) // 95.2 // p11.2	ENSMUSG00000032011	P01831 /// Q53YX2	NP_033408		NM_009382	98747	0001525 // angiogenesis // inferred from direct assay /// 0001525 // angiogenesis // inferred from sequence or structural similarity /// 0006469 // negative regulation of protein kinase activity // not recorded /// 0006469 // negative regulation of protein kinase activity // inferred from electronic annotation /// 0006469 // negative regulation of protein kinase activity // inferred from sequence…	0005783 // endoplasmic reticulum // inferred from electronic annotation /// 0005829 // cytosol // not recorded /// 0005829 // cytosol // inferred from electronic annotation /// 0005886 // plasma membrane // not recorded /// 0005886 // plasma membrane // inferred from electronic annotation /// 0005886 // plasma membrane // inferred from sequence or structural similarity /// 0009897 // external sid…	0005100 // Rho GTPase activator activity // not recorded /// 0005100 // Rho GTPase activator activity // inferred from electronic annotation /// 0005100 // Rho GTPase activator activity // inferred from sequence or structural similarity /// 0005178 // integrin binding // inferred from electronic annotation /// 0005515 // protein binding // inferred from electronic annotation /// 0019899 // enzyme…		BC054436(11),ENSMUST00000034509(11),ENSMUST00000114840(11),NM_009382(11)	Mm.3951.1	gb:AV028402 /DB_XREF=gi:4783310 /DB_XREF=AV028402 /CLONE=1422000C03 /FEA=FLmRNA /CNT=89 /TID=Mm.3951.1 /TIER=Stack /STK=43 /UG=Mm.3951 /LL=21838 /UG_GENE=Thy1 /UG_TITLE=thymus cell antigen 1, theta /FL=gb:NM_009382.1	AV028402
36458	1452163_at	E26 avian leukemia oncogene 1, 5' domain	Ets1	NM_001038642	Mm.14115	7.24748	13.8543	100.409	23871	chr9 A4|9 15.0 cM	chr9:32503923-32565405 (+) // 88.58 // p21.1	ENSMUSG00000032035	P27577 /// Q540Q5 /// Q6R5C9 /// Q6TDG7 /// Q8BKG9 /// Q8BVW8 /// Q8K3Q9 /// Q921D8	NP_001033731 /// NP_035938		NM_001038642 /// NM_011808	---	0001666 // response to hypoxia // inferred from electronic annotation /// 0006350 // transcription // inferred from electronic annotation /// 0006355 // regulation of transcription, DNA-dependent // inferred from electronic annotation /// 0006357 // regulation of transcription from RNA polymerase II promoter // inferred from direct assay /// 0006916 // anti-apoptosis // not recorded /// 0006916 /…	0005634 // nucleus // inferred from direct assay /// 0005634 // nucleus // not recorded /// 0005634 // nucleus // inferred from electronic annotation /// 0005634 // nucleus // inferred from sequence or structural similarity /// 0005667 // transcription factor complex // inferred from direct assay	0003677 // DNA binding // inferred from direct assay /// 0003677 // DNA binding // inferred from electronic annotation /// 0003700 // sequence-specific DNA binding transcription factor activity // inferred from direct assay /// 0003700 // sequence-specific DNA binding transcription factor activity // inferred from electronic annotation /// 0003700 // sequence-specific DNA binding transcription fa…		ENSMUST00000034534(11),ENSMUST00000050797(11),NM_001038642(11),NM_011808(11)	Mm.14115.2	gb:BB151715 /DB_XREF=gi:16267958 /DB_XREF=BB151715 /CLONE=A130001G21 /FEA=mRNA /CNT=158 /TID=Mm.14115.2 /TIER=Stack /STK=90 /UG=Mm.14115 /LL=23871 /UG_GENE=Ets1 /UG_TITLE=E26 avian leukemia oncogene 1, 5 domain	BB151715
11031	1426725_s_at	E26 avian leukemia oncogene 1, 5' domain	Ets1	NM_001038642	Mm.14115	5.31563	10.0646	53.4995	23871	chr9 A4|9 15.0 cM	chr9:32503923-32565405 (+) // 88.58 // p21.1	ENSMUSG00000032035	P27577 /// Q540Q5 /// Q6R5C9 /// Q6TDG7 /// Q8BKG9 /// Q8BVW8 /// Q8K3Q9 /// Q921D8	NP_001033731 /// NP_035938		NM_001038642 /// NM_011808	---	0001666 // response to hypoxia // inferred from electronic annotation /// 0006350 // transcription // inferred from electronic annotation /// 0006355 // regulation of transcription, DNA-dependent // inferred from electronic annotation /// 0006357 // regulation of transcription from RNA polymerase II promoter // inferred from direct assay /// 0006916 // anti-apoptosis // not recorded /// 0006916 /…	0005634 // nucleus // inferred from direct assay /// 0005634 // nucleus // not recorded /// 0005634 // nucleus // inferred from electronic annotation /// 0005634 // nucleus // inferred from sequence or structural similarity /// 0005667 // transcription factor complex // inferred from direct assay	0003677 // DNA binding // inferred from direct assay /// 0003677 // DNA binding // inferred from electronic annotation /// 0003700 // sequence-specific DNA binding transcription factor activity // inferred from direct assay /// 0003700 // sequence-specific DNA binding transcription factor activity // inferred from electronic annotation /// 0003700 // sequence-specific DNA binding transcription fa…		ENSMUST00000034534(11),ENSMUST00000050797(11),NM_001038642(11),NM_011808(11)	Mm.14115.2	gb:BB151715 /DB_XREF=gi:16267958 /DB_XREF=BB151715 /CLONE=A130001G21 /FEA=mRNA /CNT=158 /TID=Mm.14115.2 /TIER=Stack /STK=90 /UG=Mm.14115 /LL=23871 /UG_GENE=Ets1 /UG_TITLE=E26 avian leukemia oncogene 1, 5 domain	BB151715
41939	1457644_s_at	chemokine (C-X-C motif) ligand 1	Cxcl1	NM_008176	Mm.149204	5.14415	3.48577	17.9313	14825	chr5 E-F|5 51.0 cM	chr5:91321842-91322141 (+) // 87.83 // q14.3	ENSMUSG00000029380	A2RTH0 /// P12850 /// Q5U5W9	NP_032202		NM_008176	108068	0006954 // inflammatory response // inferred from electronic annotation /// 0006955 // immune response // inferred from electronic annotation /// 0030593 // neutrophil chemotaxis // not recorded /// 0030593 // neutrophil chemotaxis // inferred from electronic annotation	0005576 // extracellular region // inferred from electronic annotation /// 0005615 // extracellular space // inferred from direct assay /// 0005615 // extracellular space // inferred from electronic annotation	0005125 // cytokine activity // inferred from electronic annotation /// 0008009 // chemokine activity // inferred from electronic annotation /// 0008083 // growth factor activity // inferred from electronic annotation		BC037997(11),ENSMUST00000031327(11),J04596(11),NM_008176(11)	Mm.149204.1	gb:BB554288 /DB_XREF=gi:9640654 /DB_XREF=BB554288 /CLONE=E330012K12 /FEA=EST /CNT=4 /TID=Mm.149204.1 /TIER=ConsEnd /STK=4 /UG=Mm.149204 /UG_TITLE=ESTs	BB554288
3540	1419209_at	chemokine (C-X-C motif) ligand 1	Cxcl1	NM_008176	Mm.21013	3.43303	2.49703	8.57237	14825	chr5 E-F|5 51.0 cM	chr5:91320298-91322141 (+) // 88.12 // q14.3	ENSMUSG00000029380	A2RTH0 /// P12850 /// Q5U5W9	NP_032202		NM_008176	108068	0006954 // inflammatory response // inferred from electronic annotation /// 0006955 // immune response // inferred from electronic annotation /// 0030593 // neutrophil chemotaxis // not recorded /// 0030593 // neutrophil chemotaxis // inferred from electronic annotation	0005576 // extracellular region // inferred from electronic annotation /// 0005615 // extracellular space // inferred from direct assay /// 0005615 // extracellular space // inferred from electronic annotation	0005125 // cytokine activity // inferred from electronic annotation /// 0008009 // chemokine activity // inferred from electronic annotation /// 0008083 // growth factor activity // inferred from electronic annotation		BC037997(11),ENSMUST00000031327(11),J04596(9),NM_008176(11)	Mm.21013.1	gb:NM_008176.1 /DB_XREF=gi:6680108 /GEN=Gro1 /FEA=FLmRNA /CNT=19 /TID=Mm.21013.1 /TIER=FL+Stack /STK=12 /UG=Mm.21013 /LL=14825 /DEF=Mus musculus GRO1 oncogene (Gro1), mRNA. /PROD=GRO1 oncogene /FL=gb:NM_008176.1 gb:J04596.1	NM_008176
36974	1452679_at	tubulin, beta 2B	Tubb2b	NM_023716	Mm.200858	2.9411	1.79629	5.28309	73710	chr13|13 A4	chr12:11887655-11889512 (-) // 78.47 // p13.2 /// chr13:34218616-34222349 (-) // 98.61 // q13.2	ENSMUSG00000045136	B2RSN3 /// Q62363 /// Q8BK89 /// Q9CWF2	NP_076205		NM_023716	---	0001764 // neuron migration // not recorded /// 0001764 // neuron migration // inferred from electronic annotation /// 0007017 // microtubule-based process // inferred from electronic annotation /// 0007018 // microtubule-based movement // inferred from electronic annotation /// 0007067 // mitosis // inferred from electronic annotation /// 0030182 // neuron differentiation // inferred from electr…	0005874 // microtubule // inferred from electronic annotation /// 0043234 // protein complex // inferred from electronic annotation	0000166 // nucleotide binding // inferred from electronic annotation /// 0003924 // GTPase activity // inferred from electronic annotation /// 0005198 // structural molecule activity // inferred from electronic annotation /// 0005515 // protein binding // inferred from electronic annotation /// 0005525 // GTP binding // inferred from electronic annotation /// 0042277 // peptide binding // inferre…		ENSMUST00000075774(11),NM_023716(11)	Mm.200858.2	gb:AA986082 /DB_XREF=gi:3167957 /DB_XREF=uc81d12.x1 /CLONE=IMAGE:1432055 /FEA=mRNA /CNT=201 /TID=Mm.200858.2 /TIER=Stack /STK=92 /UG=Mm.200858 /LL=73710 /UG_GENE=2410129E14Rik /UG_TITLE=RIKEN cDNA 2410129E14 gene	AA986082
39003	1454708_at	actin-binding LIM protein 1	Ablim1	NM_001103177	Mm.1947	2.84096	3.36771	9.56751	226251	chr19 D2|19 53.0 cM	chr19:57107760-57109454 (-) // 94.76 // q13.43	ENSMUSG00000025085	B9EIV0 /// Q3TAG5 /// Q3U4R9 /// Q3UP03 /// Q8K278 /// Q8K4G5 /// Q9EPW6	NP_001096647 /// NP_001096648 /// NP_848803		NM_001103177 /// NM_001103178 /// NM_178688	1194500	0007010 // cytoskeleton organization // inferred from electronic annotation /// 0007411 // axon guidance // inferred from direct assay /// 0045944 // positive regulation of transcription from RNA polymerase II promoter // inferred from mutant phenotype	0005737 // cytoplasm // inferred from electronic annotation /// 0005856 // cytoskeleton // inferred from electronic annotation /// 0015629 // actin cytoskeleton // inferred from direct assay	0003779 // actin binding // inferred from direct assay /// 0003779 // actin binding // inferred from electronic annotation /// 0005515 // protein binding // inferred from physical interaction /// 0008270 // zinc ion binding // inferred from electronic annotation /// 0046872 // metal ion binding // inferred from electronic annotation		AK122196(9),ENSMUST00000079360(11),ENSMUST00000099294(11),ENSMUST00000111529(11),NM_001103177(11),NM_001103178(11),NM_178688(11)	Mm.1947.1	gb:BG065289 /DB_XREF=gi:12547852 /DB_XREF=H3029D05-3 /CLONE=H3029D05 /FEA=EST /CNT=100 /TID=Mm.1947.1 /TIER=Stack /STK=65 /UG=Mm.1947 /LL=107346 /UG_GENE=AW060987 /UG_TITLE=expressed sequence AW060987	BG065289
5534	1421228_at	chemokine (C-C motif) ligand 7	Ccl7	NM_013654	Mm.16091	2.62455	128.683	337.735	20306	chr11 C|11 46.5 cM	chr11:81859225-81861023 (+) // 91.7 // q14.1	ENSMUSG00000035373	A9Z1Z1 /// Q03366	NP_038682		NM_013654	99512	0006935 // chemotaxis // inferred from electronic annotation /// 0006954 // inflammatory response // inferred from electronic annotation /// 0006955 // immune response // inferred from electronic annotation	0005576 // extracellular region // inferred from electronic annotation /// 0005615 // extracellular space // inferred from electronic annotation	0005125 // cytokine activity // inferred from electronic annotation /// 0008009 // chemokine activity // inferred from electronic annotation /// 0008201 // heparin binding // inferred from electronic annotation		AF128193(10),AF128194(10),BC061126(10),ENSMUST00000021011(10),L04694(11),NM_013654(10),S50588(10)	Mm.16091.1	gb:AF128193.1 /DB_XREF=gi:6652905 /GEN=ScyA7 /FEA=FLmRNA /CNT=11 /TID=Mm.16091.1 /TIER=FL /STK=2 /UG=Mm.16091 /LL=20306 /DEF=Mus musculus strain B10.SJ small inducible cytokine A7 (ScyA7) mRNA, complete cds. /PROD=small inducible cytokine A7 /FL=gb:L04694.1 gb:AF128194.1 gb:NM_013654.1 gb:AF128193.1	AF128193
3892	1419561_at	chemokine (C-C motif) ligand 3	Ccl3	NM_011337	Mm.1282	2.3322	116.803	272.409	20302	chr11 C|11 47.59 cM	chr11:83461344-83462880 (-) // 92.54 // q14.1	ENSMUSG00000000982	P10855 /// Q3U6F9 /// Q5QNW0	NP_035467		NM_011337	98260	0006935 // chemotaxis // inferred from electronic annotation /// 0006954 // inflammatory response // inferred from electronic annotation /// 0006955 // immune response // inferred from electronic annotation /// 0007204 // elevation of cytosolic calcium ion concentration // not recorded /// 0007204 // elevation of cytosolic calcium ion concentration // inferred from electronic annotation /// 00305…	0005576 // extracellular region // inferred from electronic annotation /// 0005615 // extracellular space // inferred from direct assay /// 0005615 // extracellular space // inferred from electronic annotation /// 0005625 // soluble fraction // not recorded /// 0005625 // soluble fraction // inferred from electronic annotation	0005125 // cytokine activity // inferred from electronic annotation /// 0005515 // protein binding // inferred from physical interaction /// 0008009 // chemokine activity // inferred from direct assay /// 0008009 // chemokine activity // not recorded /// 0008009 // chemokine activity // inferred from electronic annotation		ENSMUST00000001008(11),J04491(11),M23447(9),NM_011337(11)	Mm.1282.1	gb:NM_011337.1 /DB_XREF=gi:6755431 /GEN=Scya3 /FEA=FLmRNA /CNT=34 /TID=Mm.1282.1 /TIER=FL+Stack /STK=8 /UG=Mm.1282 /LL=20302 /DEF=Mus musculus small inducible cytokine A3 (Scya3), mRNA. /PROD=small inducible cytokine A3 /FL=gb:J04491.1 gb:AF065943.1 gb:AF065942.1 gb:AF065941.1 gb:AF065940.1 gb:M23447.1 gb:NM_011337.1 gb:AF065939.1	NM_011337
33699	1449399_a_at	interleukin 1 beta	Il1b	NM_008361	Mm.22150	2.04784	5.47089	11.2035	16176	chr2 F|2 73.0 cM	chr2:129190313-129196866 (-) // 94.47 // q14.3	ENSMUSG00000027398	P10749 /// Q2M4J6 /// Q3TI17	NP_032387		NM_008361	96543	0000187 // activation of MAPK activity // inferred from electronic annotation /// 0001525 // angiogenesis // inferred from electronic annotation /// 0001660 // fever // inferred from electronic annotation /// 0001934 // positive regulation of protein phosphorylation // inferred from electronic annotation /// 0002439 // chronic inflammatory response to antigenic stimulus // inferred from electroni…	0005576 // extracellular region // inferred from electronic annotation /// 0005615 // extracellular space // inferred from direct assay /// 0005615 // extracellular space // not recorded /// 0005615 // extracellular space // inferred from electronic annotation /// 0030141 // stored secretory granule // inferred from direct assay /// 0031982 // vesicle // inferred from direct assay	0005125 // cytokine activity // inferred from direct assay /// 0005125 // cytokine activity // not recorded /// 0005125 // cytokine activity // inferred from electronic annotation /// 0005149 // interleukin-1 receptor binding // inferred from electronic annotation /// 0005515 // protein binding // inferred from electronic annotation /// 0008083 // growth factor activity // inferred from electroni…	Inflammatory_Response_Pathway // GenMAPP /// Smooth_muscle_contraction // GenMAPP	AK224980(11),BC011437(11),ENSMUST00000028881(11),M15131(9),NM_008361(11)	Mm.22150.1	gb:BC011437.1 /DB_XREF=gi:15030320 /FEA=FLmRNA /CNT=18 /TID=Mm.22150.1 /TIER=FL+Stack /STK=12 /UG=Mm.22150 /LL=16176 /UG_GENE=Il1b /DEF=Mus musculus, Similar to interleukin 1 beta, clone MGC:18555 IMAGE:3989461, mRNA, complete cds. /PROD=Similar to interleukin 1 beta /FL=gb:BC011437.1 gb:M15131.1 gb:NM_008361.1	BC011437
37398	1453103_at	actin-binding LIM protein 1	Ablim1	NM_001103177	Mm.203875	2.01029	2.82444	5.67794	226251	chr19 D2|19 53.0 cM	chr19:57109133-57111702 (-) // 96.46 // q13.43	ENSMUSG00000025085	B9EIV0 /// Q3TAG5 /// Q3U4R9 /// Q3UP03 /// Q8K278 /// Q8K4G5 /// Q9EPW6	NP_001096647 /// NP_001096648 /// NP_848803		NM_001103177 /// NM_001103178 /// NM_178688	---	0007010 // cytoskeleton organization // inferred from electronic annotation /// 0007411 // axon guidance // inferred from direct assay /// 0045944 // positive regulation of transcription from RNA polymerase II promoter // inferred from mutant phenotype	0005737 // cytoplasm // inferred from electronic annotation /// 0005856 // cytoskeleton // inferred from electronic annotation /// 0015629 // actin cytoskeleton // inferred from direct assay	0003779 // actin binding // inferred from direct assay /// 0003779 // actin binding // inferred from electronic annotation /// 0005515 // protein binding // inferred from physical interaction /// 0008270 // zinc ion binding // inferred from electronic annotation /// 0046872 // metal ion binding // inferred from electronic annotation		ENSMUST00000079360(11),ENSMUST00000099294(11),ENSMUST00000111529(11),NM_001103177(11),NM_001103178(11),NM_178688(11)	Mm.203875.1	gb:AK011936.1 /DB_XREF=gi:12848366 /FEA=mRNA /CNT=86 /TID=Mm.203875.1 /TIER=Stack /STK=50 /UG=Mm.203875 /LL=72478 /UG_GENE=2610209L21Rik /UG_TITLE=RIKEN cDNA 2610209L21 gene /DEF=Mus musculus 10 days embryo whole body cDNA, RIKEN full-length enriched library, clone:2610209L21:unclassifiable transcript, full insert sequence.	AK011936
4686	1420380_at	chemokine (C-C motif) ligand 2	Ccl2	NM_011333	Mm.145	1.79683	218.204	392.075	20296	chr11 C-E1|11 46.5 cM	chr11:81849085-81850958 (+) // 94.85 // q14.1	ENSMUSG00000035385	P10148 /// Q3U5L6 /// Q3U5S8 /// Q5SVU3 /// Q7TMS1	NP_035463		NM_011333	98259	0001666 // response to hypoxia // inferred from electronic annotation /// 0001938 // positive regulation of endothelial cell proliferation // not recorded /// 0001938 // positive regulation of endothelial cell proliferation // inferred from electronic annotation /// 0002548 // monocyte chemotaxis // inferred from electronic annotation /// 0006874 // cellular calcium ion homeostasis // not recorde…	0005576 // extracellular region // inferred from electronic annotation /// 0005615 // extracellular space // inferred from direct assay /// 0005615 // extracellular space // not recorded /// 0005615 // extracellular space // inferred from electronic annotation /// 0005737 // cytoplasm // not recorded /// 0005737 // cytoplasm // inferred from electronic annotation /// 0043025 // neuronal cell body…	0001664 // G-protein-coupled receptor binding // inferred from direct assay /// 0005125 // cytokine activity // inferred from electronic annotation /// 0005515 // protein binding // inferred from physical interaction /// 0005515 // protein binding // inferred from electronic annotation /// 0008009 // chemokine activity // not recorded /// 0008009 // chemokine activity // inferred from electronic …		AF065930(11),AF065931(11),AF065932(11),AF065933(11),BC055070(10),BC145867(11),BC145869(11),CT010187(11),ENSMUST00000000193(11),NM_011333(11)	Mm.145.1	gb:AF065933.1 /DB_XREF=gi:6531370 /GEN=Scya2 /FEA=FLmRNA /CNT=23 /TID=Mm.145.1 /TIER=FL /STK=5 /UG=Mm.145 /LL=20296 /DEF=Mus musculus strain NODLtJ small inducible cytokine A2 precursor (Scya2) mRNA, complete cds. /PROD=small inducible cytokine A2 precursor /FL=gb:NM_011333.1 gb:AF065932.1 gb:AF065931.1 gb:AF065930.1 gb:AF065929.1 gb:AF065933.1	AF065933
33056	1448756_at	S100 calcium binding protein A9 (calgranulin B)	S100a9	NM_009114	Mm.2128	1.72279	18.2314	31.4087	20202	chr3 F1-F2|3 43.6 cM	chr3:90496553-90499220 (-) // 89.85 // p11.1	ENSMUSG00000056071	P31725 /// Q3UP42	NP_033140		NM_009114	1338947	0006935 // chemotaxis // inferred from electronic annotation /// 0030595 // leukocyte chemotaxis // inferred from mutant phenotype /// 0031532 // actin cytoskeleton reorganization // inferred from mutant phenotype /// 0045113 // regulation of integrin biosynthetic process // inferred from mutant phenotype	0005576 // extracellular region // inferred from electronic annotation /// 0005615 // extracellular space // not recorded /// 0005737 // cytoplasm // inferred from electronic annotation /// 0005856 // cytoskeleton // inferred from electronic annotation /// 0005886 // plasma membrane // inferred from electronic annotation /// 0016020 // membrane // inferred from electronic annotation	0005509 // calcium ion binding // inferred from electronic annotation		BC027635(11),ENSMUST00000069960(11),ENSMUST00000117167(11),M83219(11),NM_009114(11)	Mm.2128.1	gb:NM_009114.1 /DB_XREF=gi:6677836 /GEN=S100a9 /FEA=FLmRNA /CNT=56 /TID=Mm.2128.1 /TIER=FL+Stack /STK=42 /UG=Mm.2128 /LL=20202 /DEF=Mus musculus S100 calcium binding protein A9 (calgranulin B) (S100a9), mRNA. /PROD=S100 calcium-binding protein A9 (calgranulin B) /FL=gb:M83219.1 gb:NM_009114.1	NM_009114
21808	1437502_x_at	CD24a antigen	Cd24a	NM_009846	Mm.6417	1.69368	2.26069	3.82887	12484	chr10 B2|10 26.0 cM	chr10:43303733-43304070 (+) // 95.06 // q11.21	ENSMUSG00000047139	P24807 /// Q3THW4 /// Q61692 /// Q8CEU3	NP_033976		NM_009846	88323	0001666 // response to hypoxia // inferred from sequence or structural similarity /// 0001775 // cell activation // inferred from sequence or structural similarity /// 0001934 // positive regulation of protein phosphorylation // inferred from sequence or structural similarity /// 0001959 // regulation of cytokine-mediated signaling pathway // inferred from mutant phenotype /// 0002237 // response…	0005624 // membrane fraction // inferred from direct assay /// 0005886 // plasma membrane // inferred from direct assay /// 0005886 // plasma membrane // inferred from electronic annotation /// 0009897 // external side of plasma membrane // inferred from direct assay /// 0009897 // external side of plasma membrane // not recorded /// 0009897 // external side of plasma membrane // inferred from el…	0019901 // protein kinase binding // inferred from sequence or structural similarity /// 0030246 // carbohydrate binding // inferred from direct assay /// 0030296 // protein tyrosine kinase activator activity // inferred from sequence or structural similarity /// 0043499 // eukaryotic cell surface binding // inferred from direct assay		BC075622(11),M58661(11),NM_009846(11)	Mm.6417.2	gb:BB560574 /DB_XREF=gi:9646940 /DB_XREF=BB560574 /CLONE=E530111O22 /FEA=EST /CNT=19 /TID=Mm.6417.2 /TIER=Stack /STK=17 /UG=Mm.6417 /LL=12484 /UG_GENE=Cd24a /UG_TITLE=CD24a antigen	BB560574
365	1416034_at	CD24a antigen	Cd24a	NM_009846	Mm.6417	1.6434	2.45693	4.03771	12484	chr10 B2|10 26.0 cM	chr10:43298930-43304073 (+) // 95.36 // q11.21 /// chr14:120043180-120048861 (+) // 89.95 //	ENSMUSG00000047139	P24807 /// Q3THW4 /// Q61692 /// Q8CEU3	NP_033976		NM_009846	88323	0001666 // response to hypoxia // inferred from sequence or structural similarity /// 0001775 // cell activation // inferred from sequence or structural similarity /// 0001934 // positive regulation of protein phosphorylation // inferred from sequence or structural similarity /// 0001959 // regulation of cytokine-mediated signaling pathway // inferred from mutant phenotype /// 0002237 // response…	0005624 // membrane fraction // inferred from direct assay /// 0005886 // plasma membrane // inferred from direct assay /// 0005886 // plasma membrane // inferred from electronic annotation /// 0009897 // external side of plasma membrane // inferred from direct assay /// 0009897 // external side of plasma membrane // not recorded /// 0009897 // external side of plasma membrane // inferred from el…	0019901 // protein kinase binding // inferred from sequence or structural similarity /// 0030246 // carbohydrate binding // inferred from direct assay /// 0030296 // protein tyrosine kinase activator activity // inferred from sequence or structural similarity /// 0043499 // eukaryotic cell surface binding // inferred from direct assay		BC075622(11),M58661(10),NM_009846(11)	Mm.6417.1	gb:BF123439 /DB_XREF=gi:10962479 /DB_XREF=601760641F1 /CLONE=IMAGE:4023467 /FEA=FLmRNA /CNT=468 /TID=Mm.6417.1 /TIER=Stack /STK=33 /UG=Mm.6417 /LL=12484 /UG_GENE=Cd24a /UG_TITLE=CD24a antigen /FL=gb:NM_009846.1 gb:M58661.1	NM_009846
44594	1460302_at	thrombospondin 1	Thbs1	NM_011580	Mm.4159	1.63536	39.7926	65.0752	21825	chr2 F1-F3|2 65.0 cM	chr2:117937628-117952869 (+) // 96.26 // q14.1	ENSMUSG00000040152	P35441 /// Q3TP59 /// Q3TPD3 /// Q3TR40 /// Q80YQ1 /// Q8CGB2	NP_035710		NM_011580	98737	0000187 // activation of MAPK activity // inferred from electronic annotation /// 0001937 // negative regulation of endothelial cell proliferation // inferred from electronic annotation /// 0001953 // negative regulation of cell-matrix adhesion // inferred from electronic annotation /// 0002040 // sprouting angiogenesis // inferred from electronic annotation /// 0002544 // chronic inflammatory re…	0005576 // extracellular region // inferred from electronic annotation /// 0005577 // fibrinogen complex // inferred from electronic annotation /// 0005615 // extracellular space // inferred from direct assay /// 0005615 // extracellular space // inferred from electronic annotation /// 0009897 // external side of plasma membrane // inferred from electronic annotation /// 0030141 // stored secreto…	0001786 // phosphatidylserine binding // inferred from electronic annotation /// 0001968 // fibronectin binding // inferred from electronic annotation /// 0005178 // integrin binding // inferred from electronic annotation /// 0005198 // structural molecule activity // inferred from electronic annotation /// 0005509 // calcium ion binding // inferred from electronic annotation /// 0005515 // prote…	Inflammatory_Response_Pathway // GenMAPP /// TGF_Beta_Signaling_Pathway // GenMAPP	BC042422(11),BC050917(10),ENSMUST00000039559(10),NM_011580(10)	Mm.4159.1	gb:AI385532 /DB_XREF=gi:4198995 /DB_XREF=mi82e10.x1 /CLONE=IMAGE:473130 /FEA=FLmRNA /CNT=282 /TID=Mm.4159.1 /TIER=Stack /STK=16 /UG=Mm.4159 /LL=21825 /UG_GENE=Thbs1 /UG_TITLE=thrombospondin 1 /FL=gb:M87276.1 gb:NM_011580.1	AI385532
21607	1437301_a_at	dishevelled, dsh homolog 1 (Drosophila)	Dvl1	NM_010091	Mm.3400	1.60825	13.4076	21.5628	13542	chr4 E2|4 82.0 cM	chr4:155233163-155233411 (+) // 74.17 // q31.3	ENSMUSG00000029071	P51141 /// Q3TRW4 /// Q3U2D3 /// Q571M1	NP_034221		NM_010091	94941	0001505 // regulation of neurotransmitter levels // inferred from mutant phenotype /// 0001932 // regulation of protein phosphorylation // inferred from genetic interaction /// 0001933 // negative regulation of protein phosphorylation // inferred from genetic interaction /// 0006366 // transcription from RNA polymerase II promoter // inferred from electronic annotation /// 0006469 // negative reg…	0005622 // intracellular // inferred from electronic annotation /// 0005624 // membrane fraction // non-traceable author statement /// 0005625 // soluble fraction // non-traceable author statement /// 0005737 // cytoplasm // inferred from electronic annotation /// 0005874 // microtubule // not recorded /// 0005874 // microtubule // inferred from electronic annotation /// 0015630 // microtubule cy…	0004871 // signal transducer activity // inferred from electronic annotation /// 0005515 // protein binding // inferred from physical interaction /// 0005515 // protein binding // inferred from electronic annotation /// 0019901 // protein kinase binding // not recorded /// 0019901 // protein kinase binding // inferred from electronic annotation /// 0042802 // identical protein binding // inferred…	Wnt_Signaling // GenMAPP	AK220168(11),BC088987(11),ENSMUST00000030948(11),NM_010091(11),U10115(11)	Mm.3400.2	gb:BB153808 /DB_XREF=gi:8808745 /DB_XREF=BB153808 /CLONE=A130017N19 /FEA=EST /CNT=27 /TID=Mm.3400.2 /TIER=Stack /STK=20 /UG=Mm.3400 /LL=13542 /UG_GENE=Dvl /UG_TITLE=dishevelled, dsh homolog (Drosophila)	BB153808
6117	1421811_at	thrombospondin 1	Thbs1	NM_011580	Mm.4159	1.56831	155.431	243.764	21825	chr2 F1-F3|2 65.0 cM	chr2:117937628-117952869 (+) // 96.26 // q14.1	ENSMUSG00000040152	P35441 /// Q3TP59 /// Q3TPD3 /// Q3TR40 /// Q80YQ1 /// Q8CGB2	NP_035710		NM_011580	98737	0000187 // activation of MAPK activity // inferred from electronic annotation /// 0001937 // negative regulation of endothelial cell proliferation // inferred from electronic annotation /// 0001953 // negative regulation of cell-matrix adhesion // inferred from electronic annotation /// 0002040 // sprouting angiogenesis // inferred from electronic annotation /// 0002544 // chronic inflammatory re…	0005576 // extracellular region // inferred from electronic annotation /// 0005577 // fibrinogen complex // inferred from electronic annotation /// 0005615 // extracellular space // inferred from direct assay /// 0005615 // extracellular space // inferred from electronic annotation /// 0009897 // external side of plasma membrane // inferred from electronic annotation /// 0030141 // stored secreto…	0001786 // phosphatidylserine binding // inferred from electronic annotation /// 0001968 // fibronectin binding // inferred from electronic annotation /// 0005178 // integrin binding // inferred from electronic annotation /// 0005198 // structural molecule activity // inferred from electronic annotation /// 0005509 // calcium ion binding // inferred from electronic annotation /// 0005515 // prote…	Inflammatory_Response_Pathway // GenMAPP /// TGF_Beta_Signaling_Pathway // GenMAPP	BC042422(11),BC050917(11),ENSMUST00000039559(11),NM_011580(11)	Mm.4159.1	gb:AV026492 /DB_XREF=gi:4803484 /DB_XREF=AV026492 /CLONE=1210001D07 /FEA=FLmRNA /CNT=282 /TID=Mm.4159.1 /TIER=Stack /STK=163 /UG=Mm.4159 /LL=21825 /UG_GENE=Thbs1 /UG_TITLE=thrombospondin 1 /FL=gb:M87276.1 gb:NM_011580.1	AI385532
