# Supplementary material for: Phagocyte Chemoattraction Is Induced through the Mcp-1–Ccr2 Axis during Efferocytosis
Source: Cells. 2021 Nov 10;10(11):3115. doi: 10.3390/cells10113115 (PMC8620886; doi:10.3390/cells10113115)
Supplement: Supplementary file 1 [file cells-10-03115-s001.zip › cells-1434864-SM-figures-revised.pdf]

# Supplementary Figures

## Phagocyte chemoattraction is induced through the Mcp-1-Ccr2 axis during efferocytosis

Sang-Ah Lee <sup>1,2</sup>, Deokhwan Kim <sup>1,2</sup>, Chanhyuk Min <sup>1,2</sup>, Byeongjin Moon <sup>1,2</sup>, Juyeon Lee <sup>1,2</sup>, Hyunji Moon <sup>1,2</sup>, Susumin Yang <sup>1,2</sup>, Chang Sup Lee<sup>3</sup>, Gwangrog Lee<sup>1,2</sup>, and Daeho Park <sup>1,2, \*</sup>

<sup>1</sup> School of Life Sciences, Gwangju Institute of Science and Technology, Gwangju 61005, Republic of Korea; sanga03@gist.ac.kr (S.-A.L.); po7322@gist.ac.kr (D.K.); alscksgur@gist.ac.kr (C.M.); byeongjinmoon@gist.ac.kr (B.M.); iris260@gist.ac.kr (J.L.); hjmoon311@gist.ac.kr (H.M.); susuminy@gist.ac.kr (S.Y.); gwangroglee@gist.ac.kr (G.L.); daehopark@gist.ac.kr (D.P.)

<sup>2</sup> Laboratory of Cell Mechanobiology, Gwangju Institute of Science and Technology, Gwangju 61005, Republic of Korea

<sup>3</sup> College of Pharmacy and Research Institute of Pharmaceutical Sciences, Gyeongsang National University, Jinju, 52828, Republic of Korea; changsup@gnu.ac.kr (C.L.)

### \*Correspondence to

Daeho Park  
School of Life Sciences  
Gwangju Institute of Science and Technology  
123 Cheomdangwagi-ro, Buk-gu  
Gwangju 61005, Korea  
Tel.: 82-62-715-2890  
Fax: 82-62-715-2484

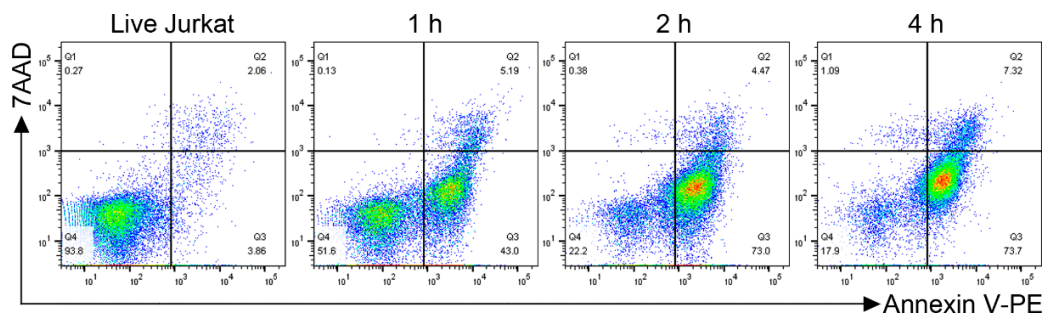

**Figure S1. The percentages of apoptotic Jurkat cells after UV irradiation**

Jurkat cells in DPBS were irradiated with 100 mJ/cm<sup>2</sup> ultraviolet-C (UVC) and then incubated in complete RPMI medium at 37°C for the indicated times. After that, the cells were stained with 7AAD and Annexin V and analyzed by flow cytometry.

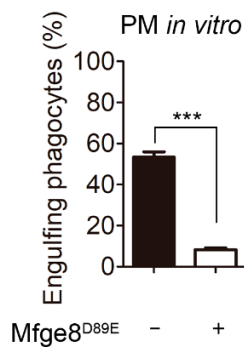

**Figure S2. Mfge8<sup>D89E</sup> abrogates efferocytosis by peritoneal macrophages**

Peritoneal macrophages derived from wild-type mice were incubated with TAMRA-labeled apoptotic thymocytes in the presence and absence of Mfge8<sup>D89E</sup> for 15 min. Then, unbound apoptotic cells were washed with ice-cold DPBS and peritoneal macrophages engulfing apoptotic cells were analyzed by flow cytometry. Data are shown as the mean  $\pm$  SEM.

\*\*\*P<0.001. PM, peritoneal macrophages.

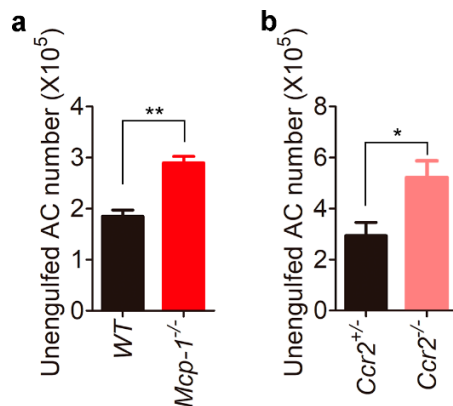

**Figure S3. Clearance of apoptotic cells is impaired in *Mcp-1*<sup>-/-</sup> and *Ccr2*<sup>-/-</sup> mice**

(a) TAMRA-labeled apoptotic thymocytes were intraperitoneally injected into *WT* or *Mcp-1*<sup>-/-</sup> mice. Two hours after injection, peritoneal exudates were collected, stained with an anti-F4/80 antibody, and analyzed by flow cytometry. The number of TAMRA-positive and F4/80-negative cells per counting bead was determined. (b) CellTracker-labeled apoptotic thymocytes were intraperitoneally injected into *Ccr2*<sup>+/-</sup> or *Ccr2*<sup>-/-</sup> mice. Two hours after injection, peritoneal exudates were stained with an anti-F4/80 antibody and analyzed by flow cytometry. The number of CellTracker-positive and F4/80-negative cells per counting bead was determined. Data are shown as the mean  $\pm$  SEM. \*P<0.05, \*\*P<0.01.
